# Supplementary material for: Hydration enthalpies of amorphous sucrose, trehalose and maltodextrins and their relationship with heat capacities
Source: Royal Society of Chemistry journal article supplement (doi:10.1039/d1cp00779c), 2021-01-01
Supplement: d1cp00779c1.pdf [file d1cp00779c1.pdf]

# Hydration enthalpies of amorphous sucrose, trehalose and maltodextrins and their relations to heat capacities

## *Supplementary Information*

Ekaterina Bogdanova<sup>1,2</sup>, Anna Millqvist Fureby<sup>3</sup> and Vitaly Kocherbitov<sup>1,2,\*</sup>

<sup>1</sup> Biomedical Science, Malmö University, Malmö, Sweden;

<sup>2</sup> Biofilms research center for Biointerfaces, Malmö, Sweden;

<sup>3</sup> RISE Research Institutes of Sweden, Stockholm, Sweden;

Table S1. Results fitting for Glucidex9 fast scan rate

| Range of data      | Resulted fitting parameters                                                                             | Results of fitting                                                                   |
|--------------------|---------------------------------------------------------------------------------------------------------|--------------------------------------------------------------------------------------|
| w=0.010:0.001:0.05 | $Tg_2 = 498.15$<br>(fixed)<br>$\Delta Cp_1 = 0.056924$<br>$\Delta Cp_2 = 0.36732$<br>$k = 0.13$ (fixed) | 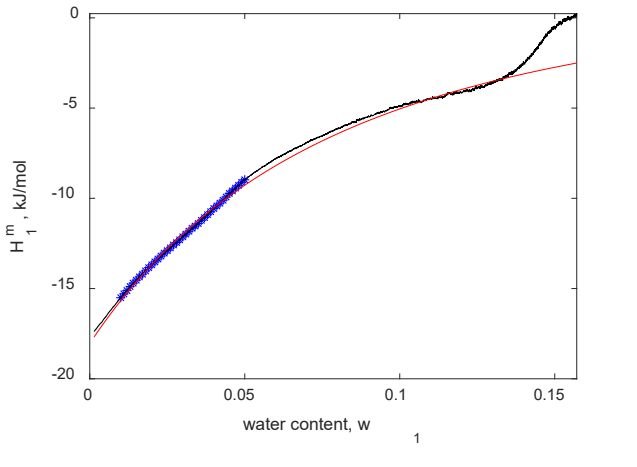   |
| w=0.05:0.001:0.12  | $Tg_2 = 498.15$<br>(fixed)<br>$\Delta Cp_1 = -0.10978$<br>$\Delta Cp_2 = 0.34626$<br>$k = 0.13$ (fixed) |   |
| w=0.01:0.001:0.12  | $Tg_2 = 498.15$<br>(fixed)<br>$\Delta Cp_1 = -0.22755$<br>$\Delta Cp_2 = 0.35303$<br>$k = 0.13$ (fixed) |  |

Table S2. Results fitting for Glucidex9 slow scan rate

| Range of data     | Resulted fitting parameters                                                                             | Results of fitting                                                                   |
|-------------------|---------------------------------------------------------------------------------------------------------|--------------------------------------------------------------------------------------|
| w=0.05:0.001:0.10 | $Tg_2 = 498.15$<br>(fixed)<br>$\Delta Cp_1 = 0.2915$<br>$\Delta Cp_2 = 0.35977$<br>$k = 0.13$ (fixed)   | 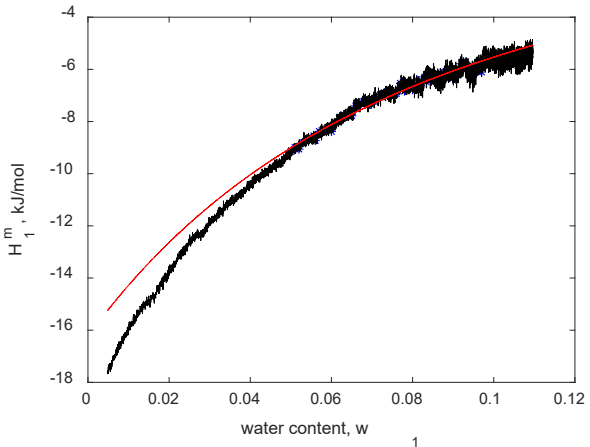   |
| w=0.01:0.001:0.05 | $Tg_2 = 498.15$<br>(fixed)<br>$\Delta Cp_1 = -0.15289$<br>$\Delta Cp_2 = 0.35821$<br>$k = 0.13$ (fixed) |   |
| w=0.01:0.001:0.10 | $Tg_2 = 498.15$ (fixed)<br>$\Delta Cp_1 = 0.025216$<br>$\Delta Cp_2 = 0.36562$<br>$k = 0.13$ (fixed)    |  |

Table S3. Results fitting for Glucidex12 fast scan rate

| Range of data      | Resulted fitting parameters                                                                             | Results of fitting                                                                   |
|--------------------|---------------------------------------------------------------------------------------------------------|--------------------------------------------------------------------------------------|
| w=0.005:0.001:0.06 | $Tg_2 = 473.15$<br>(fixed)<br>$\Delta Cp_1 = -0.49191$<br>$\Delta Cp_2 = 0.40322$<br>$k = 0.15$ (fixed) | 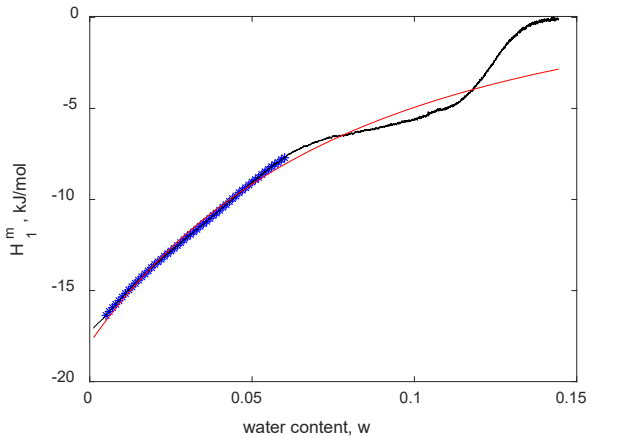   |
| w=0.07:0.001:0.11  | $Tg_2 = 473.15$<br>(fixed)<br>$\Delta Cp_1 = 0.52361$<br>$\Delta Cp_2 = 0.37799$<br>$k = 0.15$ (fixed)  |   |
| w=0.005:0.001:0.11 | $Tg_2 = 473.15$<br>(fixed)<br>$\Delta Cp_1 = -0.31551$<br>$\Delta Cp_2 = 0.41058$<br>$k = 0.15$ (fixed) |  |

Table S4. Results fitting for sucrose fast scan rate

| Range of data        | Resulted fitting parameters                                                                          | Results of fitting                                                                   |
|----------------------|------------------------------------------------------------------------------------------------------|--------------------------------------------------------------------------------------|
| w=0.0125:0.0001:0.02 | $Tg_2 = 343$<br>(fixed)<br>$\Delta Cp_1 = 3.2405$<br>$\Delta Cp_2 = 0.69599$<br>$k = 0.1718$ (fixed) | 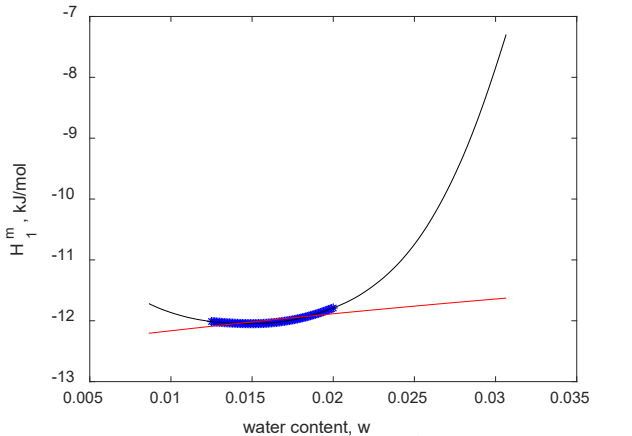   |
| w=0.015:0.0001:0.025 | $Tg_2 = 343$ (fixed)<br>$\Delta Cp_1 = 0.15834$<br>$\Delta Cp_2 = 0.67238$<br>$k = 0.1718$ (fixed)   |   |
| w=0.01:0.0001:0.02   | $Tg_2 = 343$ (fixed)<br>$\Delta Cp_1 = 3.908$<br>$\Delta Cp_2 = 0.7018$<br>$k = 0.1718$ (fixed)      |  |

Table S5. Results fitting for sucrose slow scan rate

| Range of data         | Resulted fitting parameters                                                                         | Results of fitting                                                                   |
|-----------------------|-----------------------------------------------------------------------------------------------------|--------------------------------------------------------------------------------------|
| w=0.005:0.0001:0.0    | $Tg_2 = 343$ (fixed)<br>$\Delta Cp_1 = -0.82376$<br>$\Delta Cp_2 = 0.77599$<br>$k = 0.1718$ (fixed) | 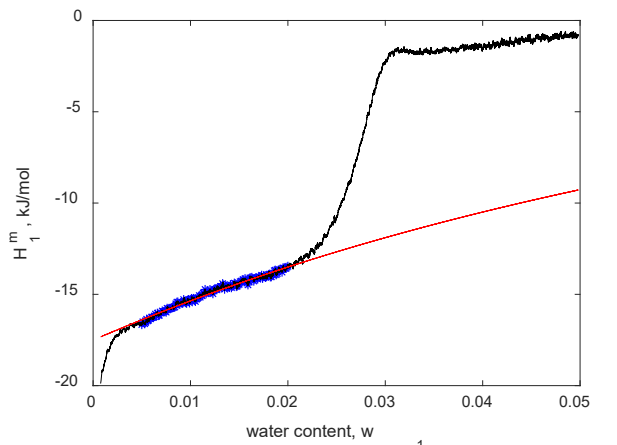   |
| w=0.005:0.0001:0.012  | $Tg_2 = 343$ (fixed)<br>$\Delta Cp_1 = -1.9828$<br>$\Delta Cp_2 = 0.74873$<br>$k = 0.1718$ (fixed)  |   |
| w=0.0125:0.0001:0.02; | $Tg_2 = 343$ (fixed)<br>$\Delta Cp_1 = 0.062949$<br>$\Delta Cp_2 = 0.78542$<br>$k = 0.1718$ (fixed) |  |

Table S6. Results fitting for trehalose slow scan rate

| Range of data      | Resulted fitting parameters                                                                          | Results of fitting                                                                   |
|--------------------|------------------------------------------------------------------------------------------------------|--------------------------------------------------------------------------------------|
| w=0.02:0.001:0.06  | $Tg_2 = 393.15$ (fixed)<br>$\Delta Cp_1 = 2.2527$<br>$\Delta Cp_2 = 0.87291$<br>$k = 0.1923$ (fixed) | 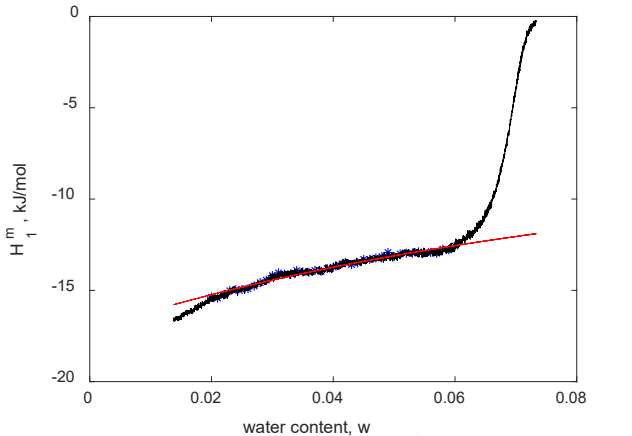   |
| w=0.02:0.001:0.04  | $Tg_2 = 393.15$ (fixed)<br>$\Delta Cp_1 = 1.8043$<br>$\Delta Cp_2 = 0.85932$<br>$k = 0.1923$ (fixed) |   |
| w=0.04:0.001:0.06; | $Tg_2 = 393.15$ (fixed)<br>$\Delta Cp_1 = 2.6533$<br>$\Delta Cp_2 = 0.87185$<br>$k = 0.1923$ (fixed) |  |

Table S7. Results fitting for trehalose fast scan rate

| Range of data      | Resulted fitting parameters                                                                             | Results of fitting |
|--------------------|---------------------------------------------------------------------------------------------------------|--------------------|
| w=0.02:0.001:0.050 | $Tg_2 = 393.15$<br>(fixed)<br>$\Delta Cp_1 = 2.7218$<br>$\Delta Cp_2 = 0.76109$<br>$k = 0.1923$ (fixed) |                    |
| w=0.02:0.001:0.035 | $Tg_2 = 393.15$<br>(fixed)<br>$\Delta Cp_1 = 2.8006$<br>$\Delta Cp_2 = 0.76379$<br>$k = 0.1923$ (fixed) |                    |
| w=0.035:0.001:0.05 | $Tg_2 = 393.15$<br>(fixed)<br>$\Delta Cp_1 = 2.6716$<br>$\Delta Cp_2 = 0.76056$<br>$k = 0.1923$ (fixed) |                    |



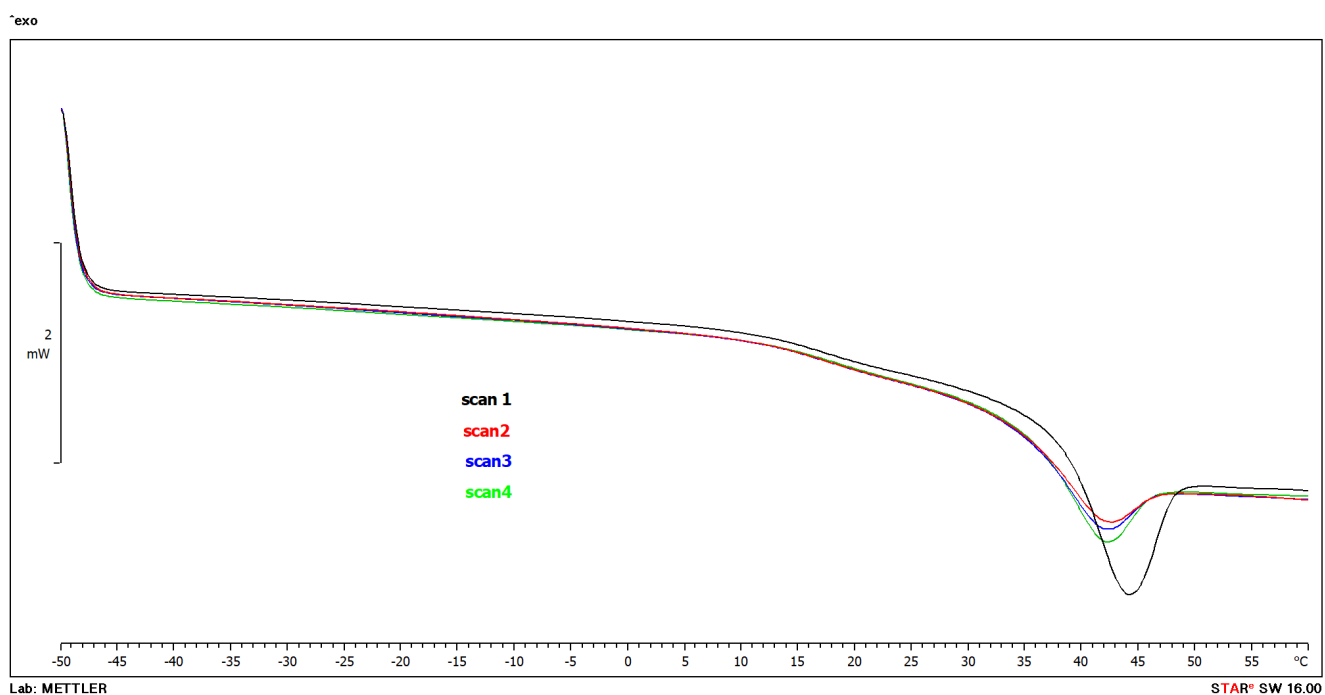

Figure S1. DSC thermograms of 4 scans sucrose-water (2.5 wt%) sample obtained by freeze-drying. Scan 1 –black colour, scan 2 – red, scan 3 – blue, scan 4 – green.

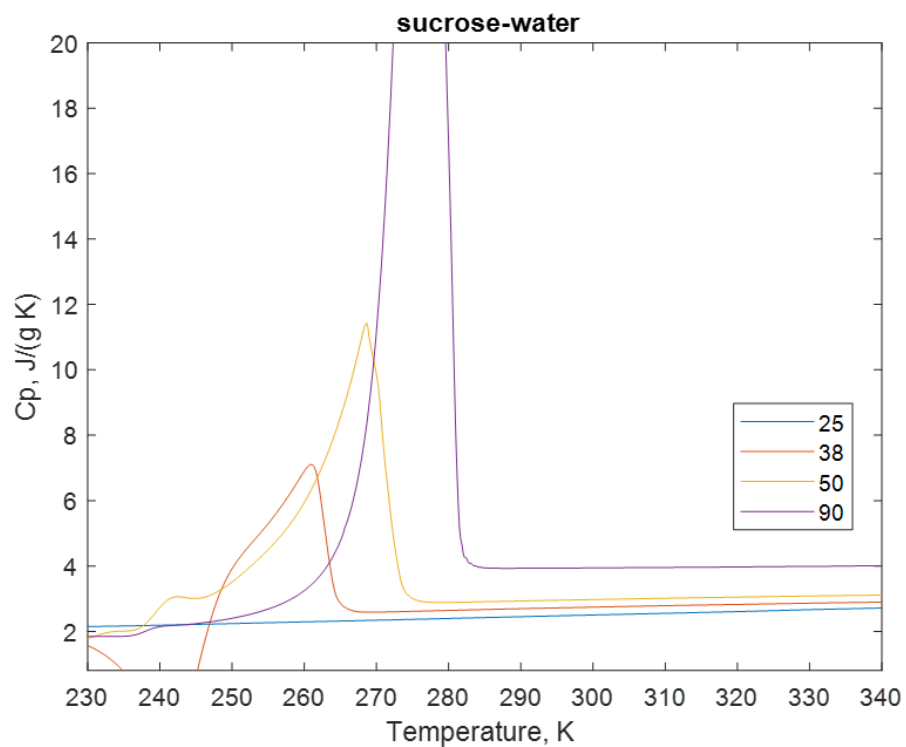

Figure S2. Heat capacities of sucrose-water system. Different colours correspond with different water content.

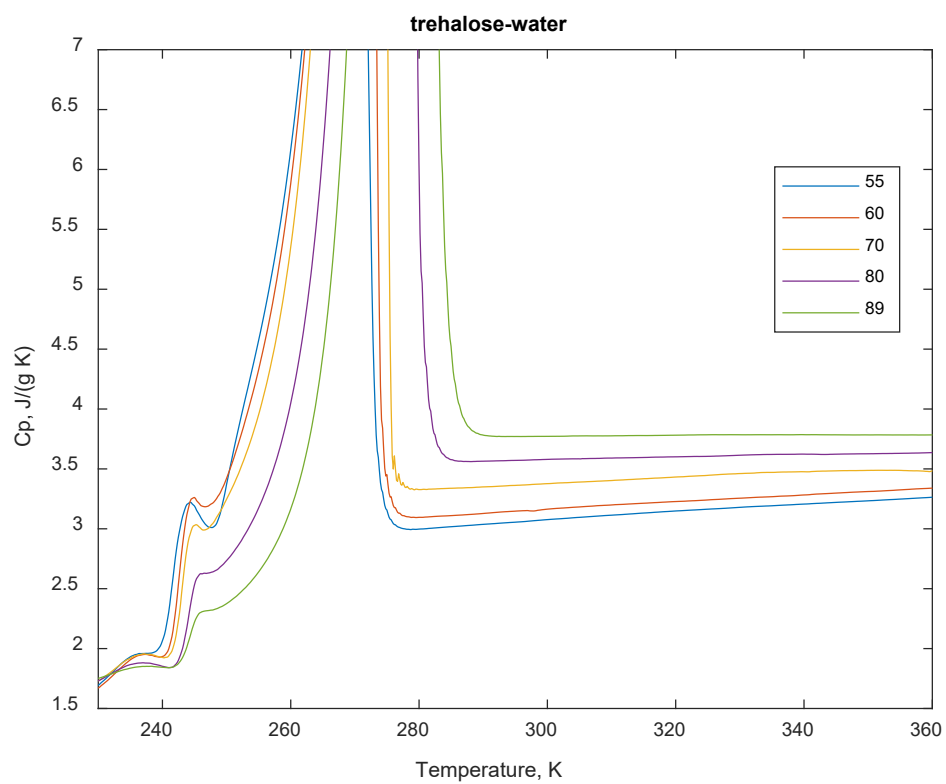

Figure S3. Heat capacities of trehalose-water system. Different colours correspond with different water content.

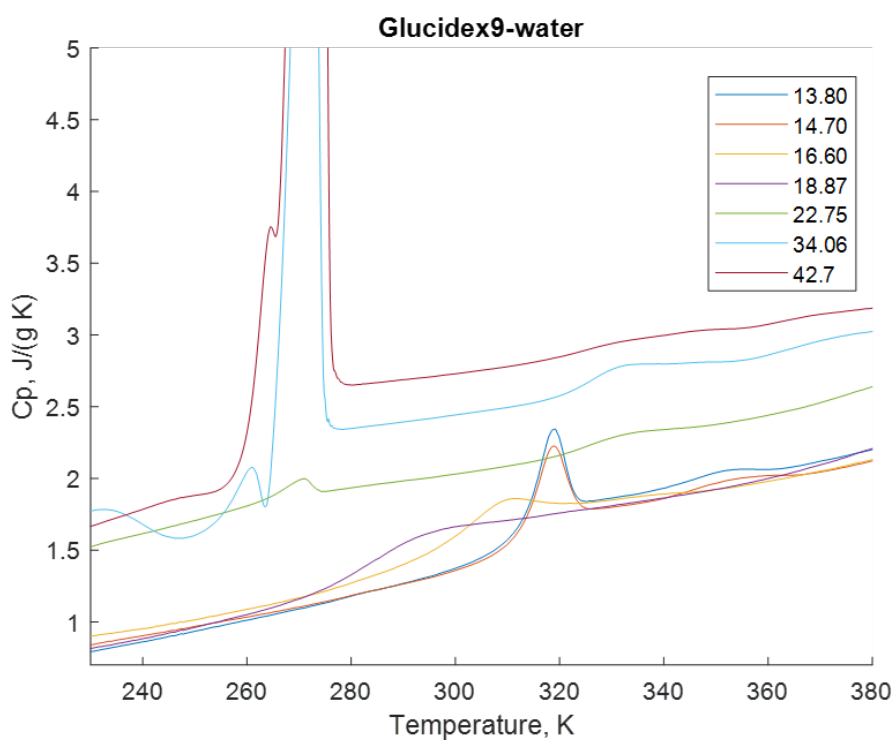

Figure S4. Heat capacities of Glucidex9-water system. Different colours correspond with different water content (13.8-42.7 wt %).

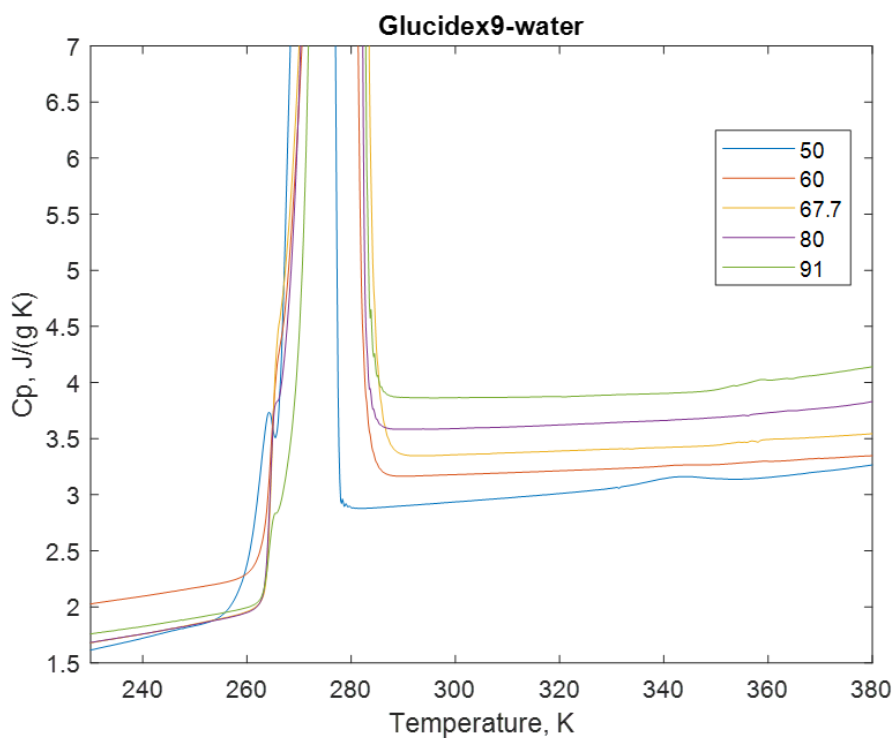

Figure S5. Heat capacities of Glucidex9-water system. Different colours correspond with different water content (50-91 wt %).

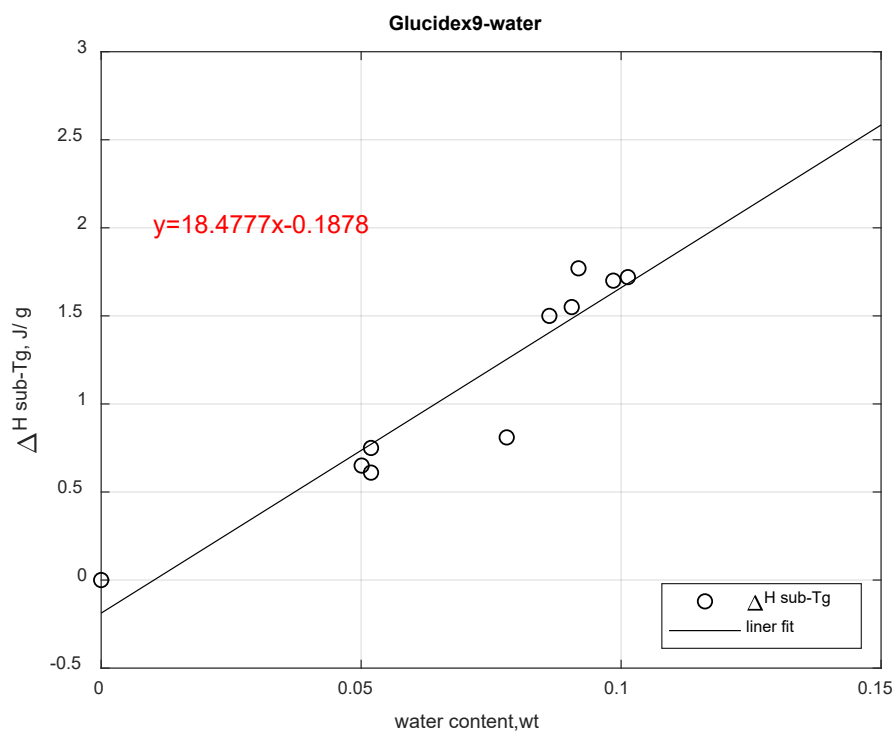

Figure S6. The enthalpy of sub-Tg transition dependence on water content for Glucidex9-water system.

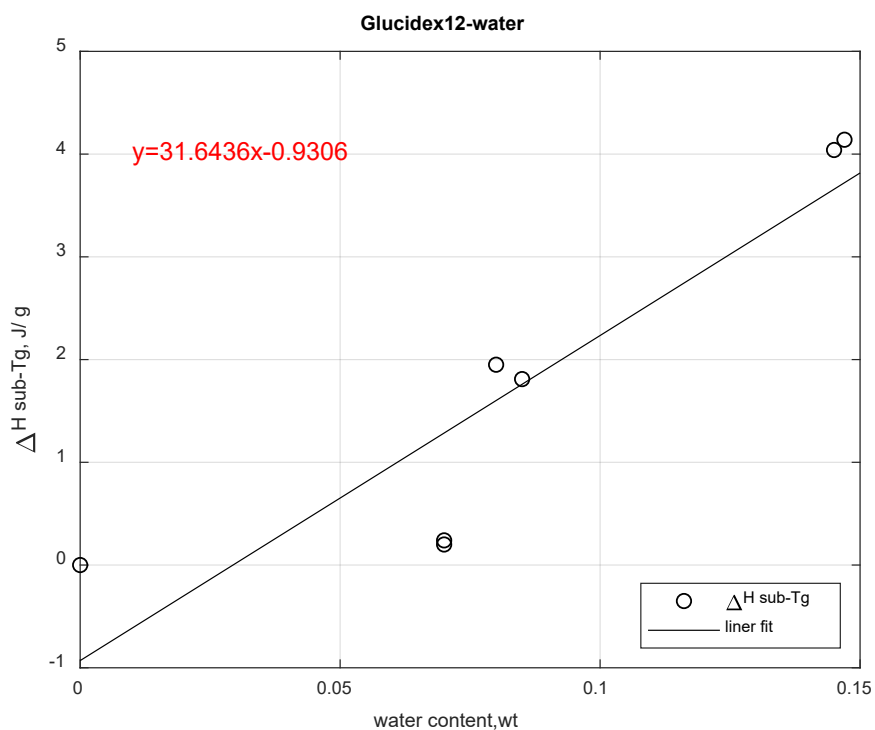

Figure S7. The enthalpy of sub-Tg transition dependence on water content for Glucidex12-water system.
